# Supplementary material for: Subgingival Microbiome and Specialized Pro-Resolving Lipid Mediator Pathway Profiles Are Correlated in Periodontal Inflammation
Source: Front Immunol. 2021 Jun 10;12:691216. doi: 10.3389/fimmu.2021.691216 (PMC8222734; doi:10.3389/fimmu.2021.691216)

**Supplementary Figure 1. Correlations between lipid mediator profile, specialized pro-resolving lipid mediator (SPM) receptor gene profile and subgingival microbiome profile at the genus level. (A)** The component correlation plots represent subgingival microbiome-lipid mediator profile (upper-middle box), subgingival microbiome-receptor gene profile (upper-right box), and lipid mediator-receptor gene profile (middle-right box). The correlation coefficient of these profiles: subgingival microbiome-lipid mediator (middle-left box)= 0.50; subgingival microbiome-receptor gene (lower-left box)= 0.41; lipid mediator-receptor gene (lower-middle box)= 0.36. **(B)** The correlation plot demonstrates the subgingival microbiome-lipid mediator correlation patterns in each subject group. The correlation coefficients for the H, P and A groups are 0.75, 0.43 and 0.42, respectively. Many of the subject's subgingival microbiome-lipid mediator profiles (subjects are labeled in the plot) in periodontitis before treatment move toward the healthy patterns after treatment. (H (green): healthy; P (red): periodontitis before non-surgical therapy; A (blue): periodontitis after non-surgical therapy; one dot represents one subject's profile in each group; numbers on axes represent relative levels of bacterial species, lipid mediators or receptor gene expression; the analyses are performed using the DIABLO method.)

(A)

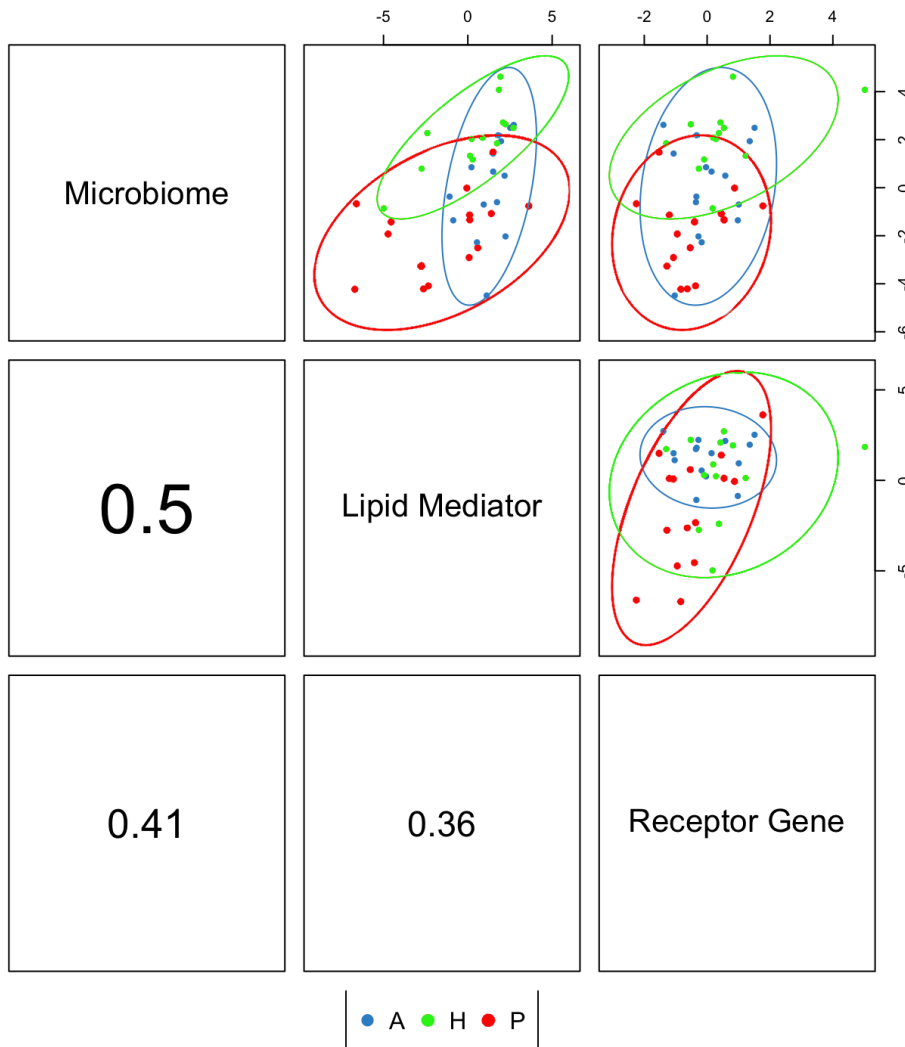

(B)

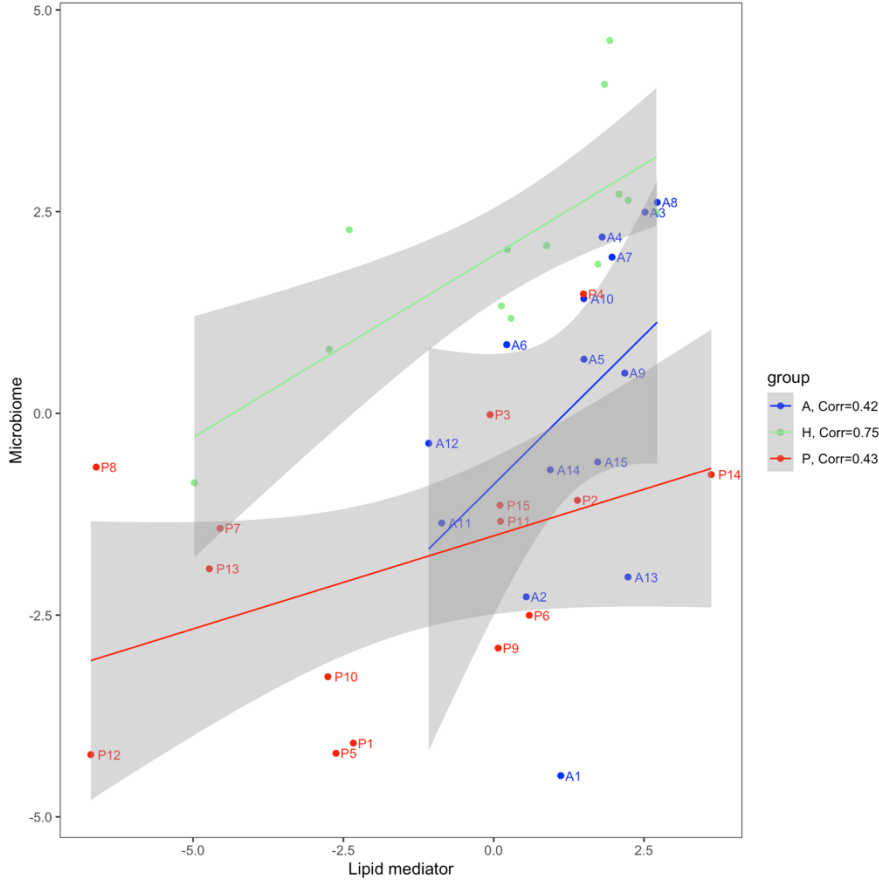

Supplement: Supplementary file 1 [file Image_1.pdf]
